# Supplementary material
Source: HighWire-hosted journal article supplement (https://bmjopen.bmj.com/content/10/7/e034849)
Supplement: inline-supplementary-material-1 [file inline-supplementary-material-1.pdf]

## Appendix Search strategy Psychosocial risk factors and SRDs 12-08-2019

## Medline

1. exp Occupations/ or Workload/ or exp Work/ or Workplace/ or exp Occupational Diseases/ or Rehabilitation, Vocational/ or Occupational Health/ or Sick Leave/ or Absenteeism/ or Retirement/ or workers' compensation/ or exp Employment/ or exp Occupational Exposure/ or Volunteers/
2. (worka\* or worke\* or workg\* or worki\* or workl\* or workp\* or work capacity or work disabilit\* or work abilit\* or at work or work exposure or work related or workers or job\* or employee or staff or personnel or occupation or occupations or occupational or outdoor work\* or day shift\* or night shift\* or shift work\* or vocational rehabilitation or sick leave or absenteeism or sickness absen\* or absente\* or presente\* or return to work or vocational reintegration or retirement or pension or employment or unemployed or unemployment or work status or industries or volunteer\* or voluntary worker\*).ab,kw,ti.
3. or/1-2 [working population]
4. risk/ or risk assessment/ or risk factors/ or cohort studies/ or Follow-Up Studies/
5. (risk\* or Case control or cohort stud\* or Cohort analy\* or follow up stud\* or observational stud\* or Longitudinal).ab,kw,ti.
6. or/4-5 [aetiology]
7. Burnout, Professional/ or neurasthenia/ or adjustment disorders/
8. (burnout or burn out or neurasthenia or adjustment disorder? or emotional exhaustion or job stress or work stress or occupational stress or job strain or work strain).ab,kw,ti.
9. (occupational health/ or occupational disease/) and (psychiatric disorder? or psychiatric morbidity or psychosocial or psycho social or occupational stress or distress).ab,kw,ti.
10. or/7-9 [burnout]
11. (stress symptom\* or psychologic\* stress or psychologic\* distress or psychosocial risk\* or psycho social risk\* or psychosocial factor\* or psycho social factor\* or psychiatric morbidit\* or psychiatric disorder\*).ab,kw,ti. [stress related symptoms and disorders]
12. 3 and 6 and 10
13. ((worka\* or worke\* or workg\* or worki\* or workl\* or workp\* or work capacity or work disabilit\* or work abilit\* or at work or work exposure or work related or workers or job\* or employee or staff or personnel or occupation or occupations or occupational or outdoor work\* or day shift\* or night shift\* or shift work\* or vocational rehabilitation or sick leave or absenteeism or sickness absen\* or absente\* or presente\* or return to work or vocational reintegration or retirement or pension or employment or unemployed or unemployment or work status or industries or volunteer\* or voluntary worker\*) adj1 (stress symptom\* or psychologic\* stress or psychologic\* distress or psychosocial risk\* or psycho social risk\* or psychosocial factor\* or psycho social factor\* or psychiatric morbidit\* or psychiatric disorder\*).ab,kw,ti.
14. 6 and 13
15. ((risk\* or Case control or cohort stud\* or Cohort analy\* or follow up stud\* or observational stud\* or Longitudinal) adj1 (stress symptom\* or psychologic\* stress or psychologic\* distress or psychosocial risk\* or psycho social risk\* or psychosocial factor\* or psycho social factor\* or psychiatric morbidit\* or psychiatric disorder\*).ab,kw,ti.
16. 3 and 15
17. 12 or 14 or 16
18. limit 17 to (dutch or english or german)

## PsycINFO

1. (occupational employment testing or occupational interests guidance or occupational vocational rehabilitation or working conditions industrial safety).cc.
2. exp occupations/ or career change/ or career development/ or exp "division of labor"/ or employment history/ or exp job characteristics/ or occupational adjustment/ or occupational aspirations/ or occupational attitudes/ or occupational choice/ or occupational exposure/ or occupational guidance/ or occupational interests/ or occupational mobility/ or occupational preference/ or occupational safety/ or occupational status/ or occupational success/ or exp occupational tenure/ or exp personnel/ or exp professional personnel/ or working women/ or "work (attitudes toward)"/ or Workplace Violence/ or Diversity in the Workplace/ or exp working conditions/ or exp vocational rehabilitation/ or Occupational Health/ or employee absenteeism/ or Retirement/ or exp employment status/ or reemployment/ or Volunteers/
3. (worka\* or worke\* or workg\* or worki\* or workl\* or workp\* or work capacity or work disabilit\* or work abilit\* or at work or work exposure or work related or workers or job\* or employee or staff or personnel or occupation or occupations or occupational or outdoor work\* or day shift\* or night shift\* or shift work\* or vocational rehabilitation or sick leave or absenteeism or sickness absen\* or absente\* or presente\* or return to work or vocational reintegration or retirement or pension or employment or unemployed or unemployment or work status or industries or volunteer\* or voluntary worker\*).ab,id,ti.
4. or/1-3 [working population]

5. Risk Assessment/ or At Risk Populations/ or Risk Factors/ or clinical trials/ or cohort analysis/ or followup studies/ or exp longitudinal studies/
6. (risk\* or Case control or cohort stud\* or Cohort analy\* or follow up stud\* or observational stud\* or Longitudinal).ab,id,ti.
7. or/5-6 [aetiology]
8. occupational stress/ or work related illnesses/ or neurasthenia/ or adjustment disorders/
9. (neurasthenia or burnout or burn out or emotional exhaustion or job stress or work stress or occupational stress or job strain or work strain or adjustment disorder?).ab,id,ti.
10. 8 or 9 [burnout]
11. (stress or distress).ab,id,ti.
12. 4 and 7 and 10
13. ((risk\* or Case control or cohort stud\* or Cohort analy\* or follow up stud\* or observational stud\* or Longitudinal) adj3 (stress or distress)).ab,id,ti.
14. 4 and 13
15. 12 or 14
16. limit 15 to ("0100 journal" or "0110 peer-reviewed journal" or "0120 non-peer-reviewed journal" or "0130 peer-reviewed status unknown" or "0400 dissertation abstract")
17. limit 16 to (dutch or english or german)

=====

Embase

=====

1. exp \*occupation/ or exp \*occupational health/ or \*work/ or \*workplace/ or \*"employment of women"/ or exp \*income/ or \*workman compensation/ or exp \*employment/ or exp \*named groups by occupation"/
2. (worka\* or worke\* or workg\* or worki\* or workl\* or workp\* or work capacity or work disabilit\* or work abilit\* or at work or work exposure or work related or workers or job\* or employee or staff or personnel or occupation or occupations or occupational or outdoor work\* or day shift\* or night shift\* or shift work\* or vocational rehabilitation or sick leave or absenteeism or sickness absen\* or absente\* or presente\* or return to work or vocational reintegration or retirement or pension or employment or unemployed or unemployment or work status or industries or volunteer\* or voluntary worker\*).ab,kw,ti.
3. or/1-2 [working population]
4. \*risk/ or \*risk assessment/ or \*risk factor/ or \*cohort analysis/ or \*Follow-Up/
5. (risk\* or Case control or cohort stud\* or Cohort analy\* or follow up stud\* or observational stud\* or Longitudinal).ab,kw,ti.
6. or/4-5 [etiology]
7. \*Burnout/ or \*neurasthenia/ or \*adjustment disorder/ or \*emotional stress/ or \*job stress/
8. (burnout or burn out or neurasthenia or adjustment disorder? or emotional exhaustion or job stress or work stress or occupational stress or job strain or work strain).ab,kw,ti.
9. (occupational health/ or occupational disease/) and (psychiatric disorder? or psychiatric morbidity or psychosocial or psycho social or occupational stress or distress).ab,kw,ti.
10. or/7-9 [burnout]
11. (stress symptom\* or psychologic\* stress or psychologic\* distress or psychosocial risk\* or psycho social risk\* or psychosocial factor\* or psycho social factor\* or psychiatric morbidit\* or psychiatric disorder\*).ab,kw,ti. [stress related symptoms and disorders]
12. 3 and 6 and 10
13. ((worka\* or worke\* or workg\* or worki\* or workl\* or workp\* or work capacity or work disabilit\* or work abilit\* or at work or work exposure or work related or workers or job\* or employee or staff or personnel or occupation or occupations or occupational or outdoor work\* or day shift\* or night shift\* or shift work\* or vocational rehabilitation or sick leave or absenteeism or sickness absen\* or absente\* or presente\* or return to work or vocational reintegration or retirement or pension or employment or unemployed or unemployment or work status or industries or volunteer\* or voluntary worker\*) adj1 (stress symptom\* or psychologic\* stress or psychologic\* distress or psychosocial risk\* or psycho social risk\* or psychosocial factor\* or psycho social factor\* or psychiatric morbidit\* or psychiatric disorder\*).ab,kw,ti.
14. 6 and 11 and 13
15. ((risk\* or Case control or cohort stud\* or Cohort analy\* or follow up stud\* or observational stud\* or Longitudinal) adj1 (stress symptom\* or psychologic\* stress or psychologic\* distress or psychosocial risk\* or psycho social risk\* or psychosocial factor\* or psycho social factor\* or psychiatric morbidit\* or psychiatric disorder\*).ab,kw,ti.
16. 3 and 15
17. 12 or 14 or 16
18. limit 17 to (dutch or english or german)
